# Supplementary material
Source: PubMed Central journal article supplement (PMC3766736)
Supplement: NIHMS499718-supplement-01.pdf [file NIHMS499718-supplement-01.pdf]

M D1 S1 D2 S2 D3 S3 D4 S4 D5 S5 D6 S6 D7 S7 D8 S8 D9 S9

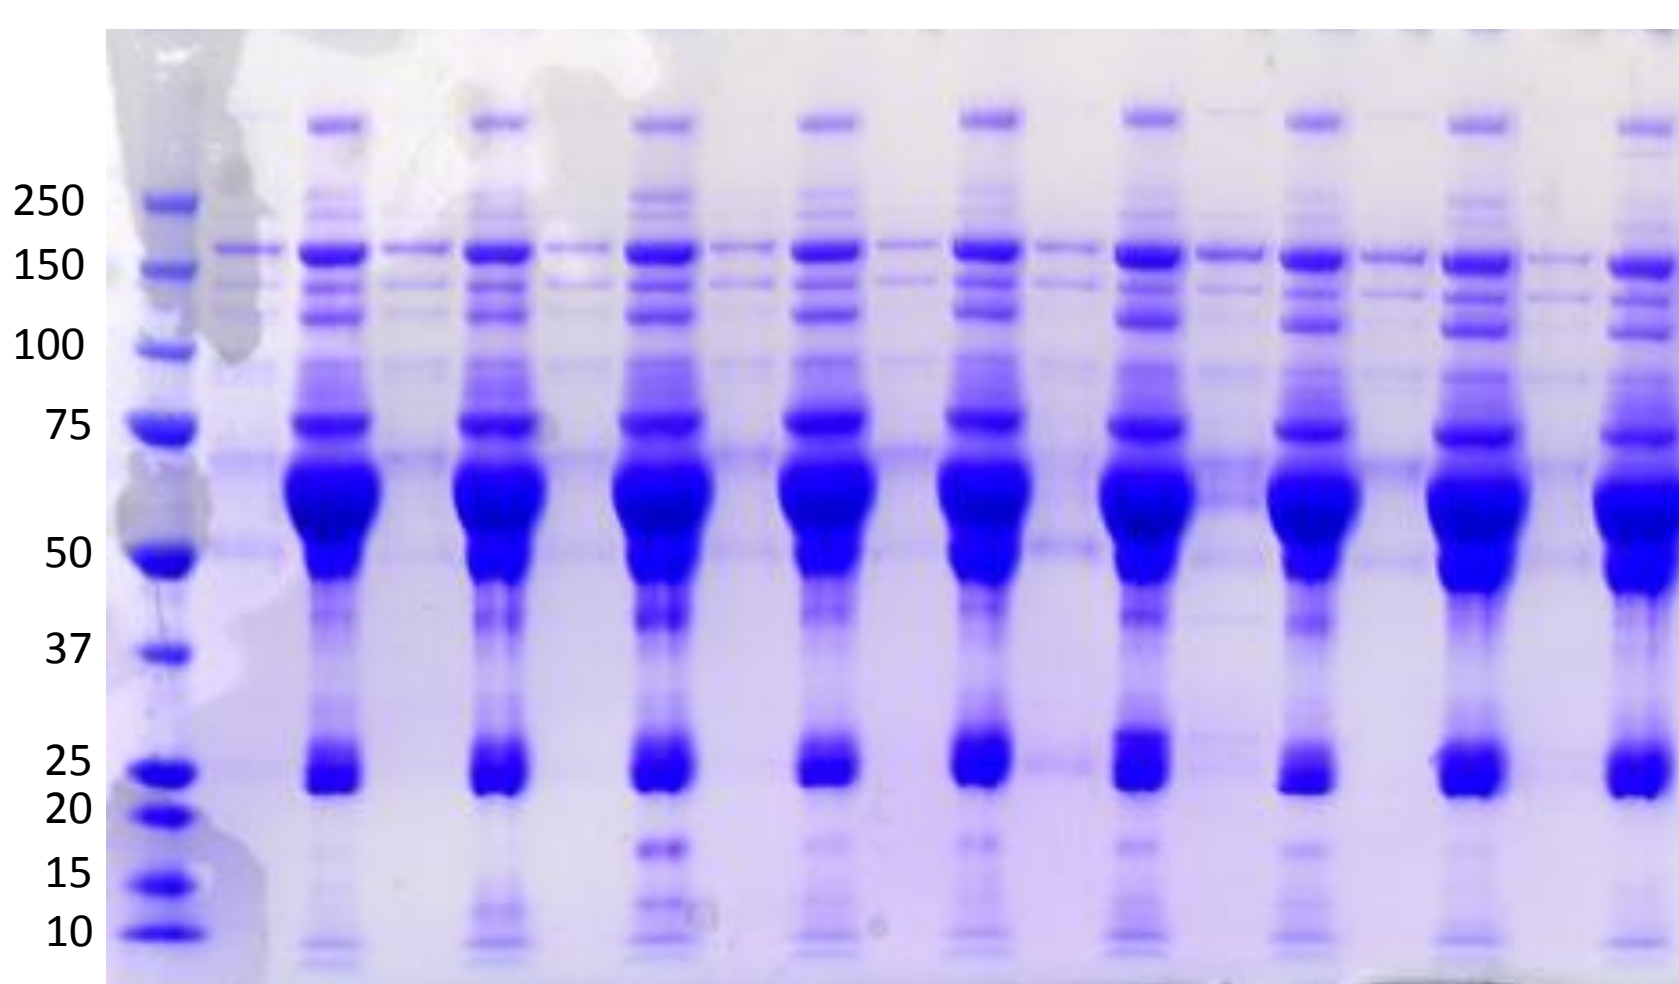

Supplemental Figure 1. A typical titration curve (peptide VANYVDWINDR) shows the correct amount of heavy peptide needed to be spiked-in to human blood samples (100 femtomole in this case). X-axis: peptide amount in femtomole, y-axis: total peak AUC (area under transition curve). Synthetic heavy-labeled peptide is in red and endogenous light peptide is in blue.

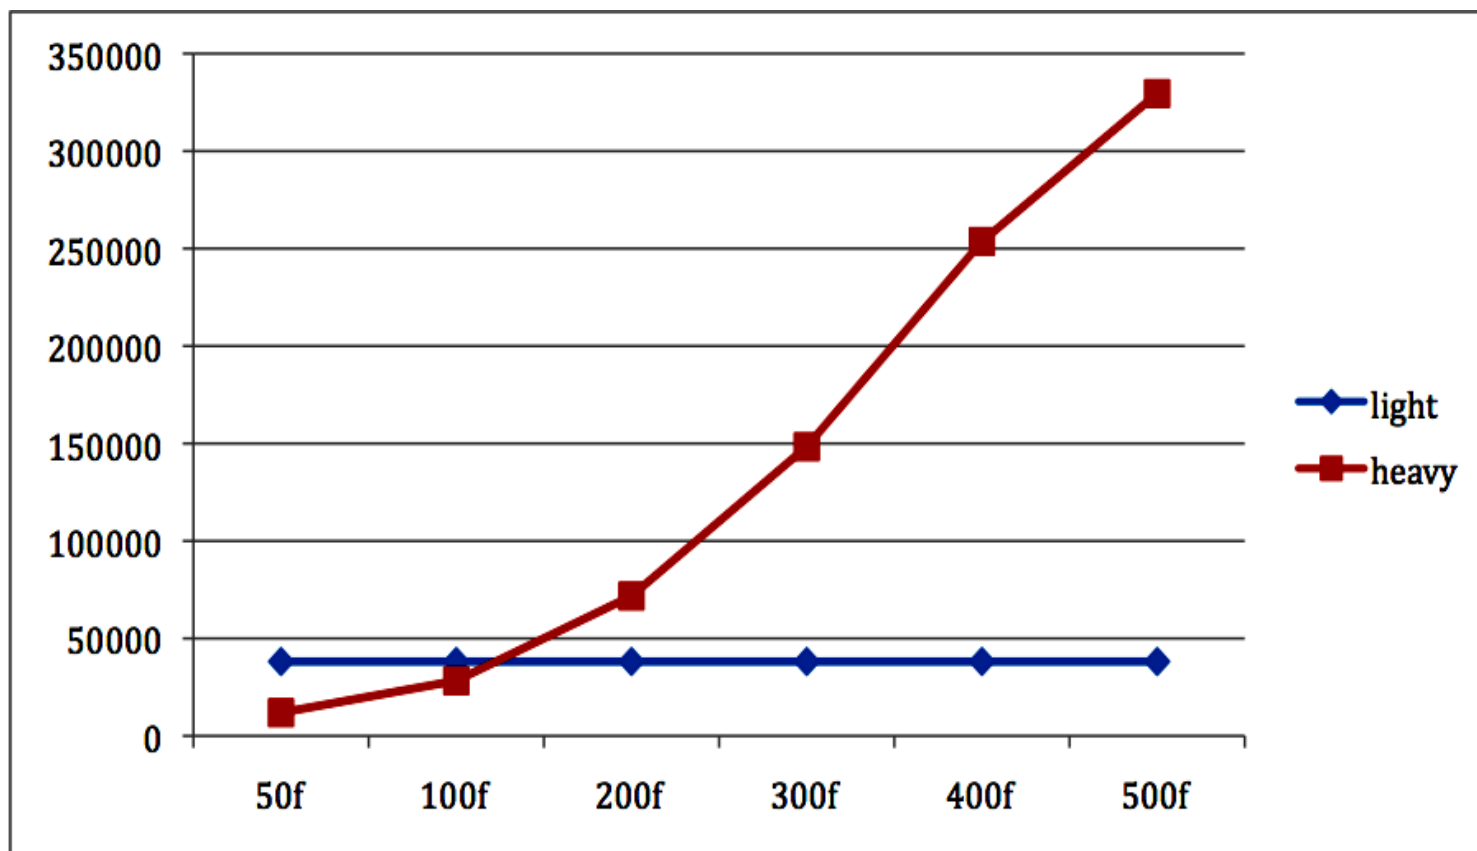

Supplemental Figure 2. A typical titration curve (peptide VANYVDWINDR) shows the correct amount of heavy peptide needed to be spiked-in to human blood samples (100 femtomole in this case). X-axis: peptide amount in femtomole, y-axis: total AUC (area under transition curve). Synthetic heavy-labeled peptide is in red and endogenous light peptide is in blue.

PROTEOMICS

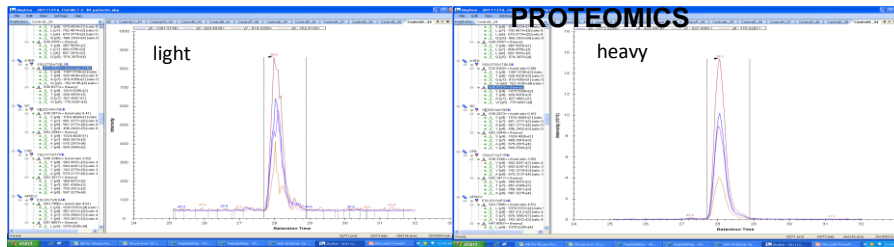

CFH/CTSTGWIPAPR

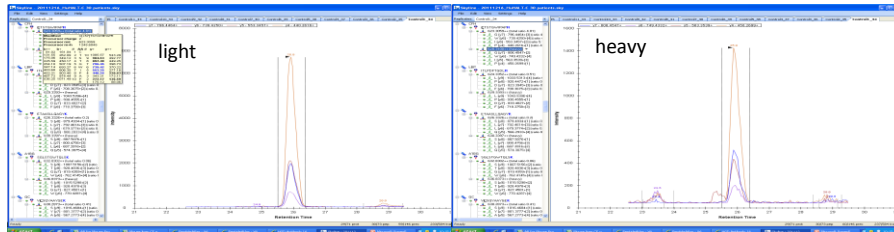

IGFALS/VAGLLEDFPGLLGLR

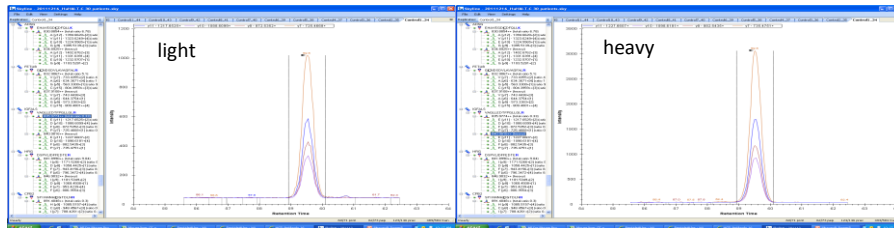

PROC/TFVLNFIK

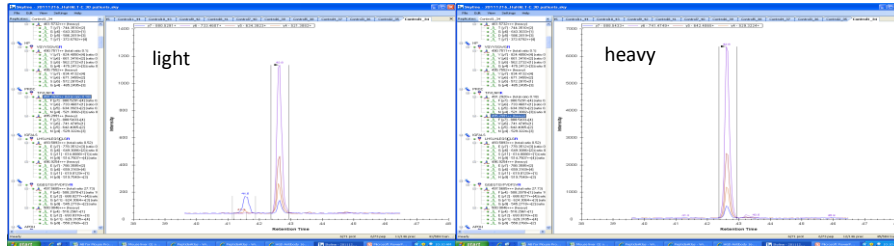

RBP4/YWGVASFLQK

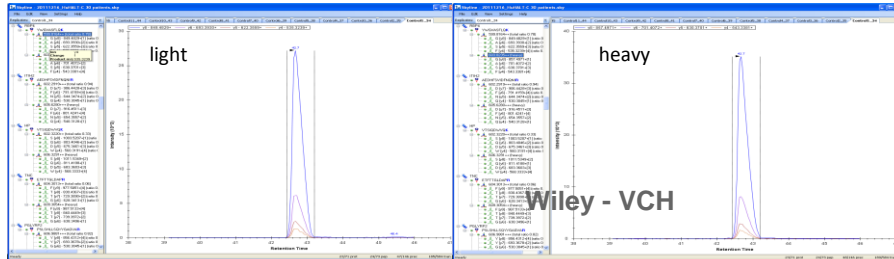

1  
2  
3  
4  
5  
6  
7  
8  
9  
10  
11  
12  
13  
14  
15  
16  
17  
18  
19  
20  
21  
22  
23  
24  
25  
26  
27  
28  
29  
30  
31  
32  
33  
34  
35  
36  
37  
38  
39  
40  
41  
42  
43

Supplementary Figure 3. Typical chromatograms of 5 targeted peptides.

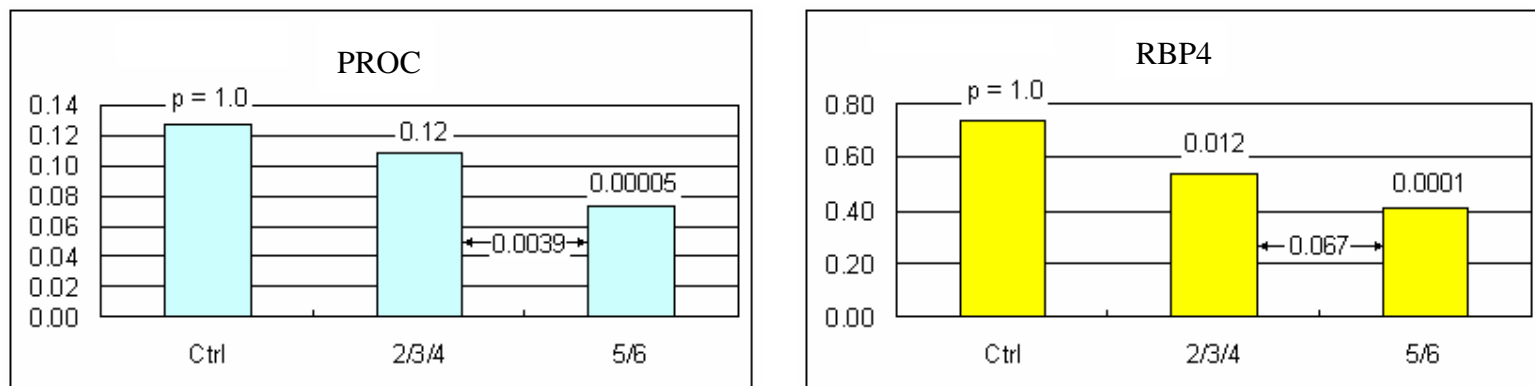

Supplemental Figure 4. The mean of serum protein levels among control, Ishak 2-4 and Ishak 5-6 patient samples. There is a significant decrease of PROC levels in Ishak 5-6 patients as compared to Ishak 2-4 patients ( $P=0.004$ ). PROC levels in Ishak 5-6 patients are also significantly lower than controls ( $P=0.00005$ ). Both Ishak 2-4 and patients 5-6 patients' RBP4 levels are significantly lower than controls ( $P=0.01$  and  $P=0.0001$  with or without outliers, respectively). Comparison of RBP4 levels in Ishak 5-6 patients to Ishak 2-4 patients shows a  $P$  value of 0.07 with outliers and  $P$  value of 0.02 without outliers.

**Supp. Table 1.** Patient information on age, gender, platelet counts, AST, ALT, and alkaline phosphatase levels in blood and Ishak scores when enrolled in the HALT-C trial.

| Serum sample ID | AGE | Gender | Platelets (x1000/mm3) | AST (U/L) | ALT (U/L) | Alkaline phosphatase (U/L) | Fibrosis-Ishak score |
|-----------------|-----|--------|-----------------------|-----------|-----------|----------------------------|----------------------|
| DA 000047       | 48  | M      | 232                   | 89        | 121       | 78                         | 2                    |
| DI 000933       | 27  | M      | 418                   | 68        | 133       | 111                        | 2                    |
| DJ 001681       | 58  | M      | 208                   | 31        | 27        | 100                        | 2                    |
| DH 001854       | 48  | F      | 222                   | 44        | 67        | 86                         | 2                    |
| DH 001868       | 44  | F      | 270                   | 46        | 56        | 41                         | 2                    |
| DB 001537       | 47  | M      | 132                   | 46        | 73        | 80                         | 3                    |
| DD 000089       | 54  | M      | 188                   | 55        | 46        | 76                         | 3                    |
| DD 000830       | 53  | M      | 243                   | 69        | 113       | 85                         | 3                    |
| DD 001302       | 49  | M      | 218                   | 43        | 68        | 61                         | 3                    |
| DD 001616       | 45  | M      | 216                   | 35        | 60        | 71                         | 3                    |
| DJ 000111       | 51  | M      | 208                   | 64        | 75        | 97                         | 3                    |
| DI 001315       | 46  | F      | 274                   | 72        | 117       | 75                         | 3                    |
| DJ 000004       | 47  | F      | 105                   | 113       | 91        | 69                         | 3                    |
| DA 000043       | 51  | M      | 280                   | 58        | 82        | 46                         | 4                    |
| DD 000019       | 48  | M      | 194                   | 62        | 68        | 80                         | 4                    |
| DD 001632       | 49  | M      | 135                   | 89        | 141       | 82                         | 4                    |
| DF 001110       | 50  | M      | 98                    | 46        | 42        | 117                        | 4                    |
| DJ 001239       | 52  | M      | 169                   | 50        | 71        | 108                        | 4                    |
| DA 001416       | 56  | F      | 143                   | 98        | 121       | 61                         | 4                    |
| DD 000008       | 56  | F      | 259                   | 34        | 46        | 117                        | 4                    |
| DA 000024       | 53  | M      | 132                   | 157       | 261       | 68                         | 5                    |
| DA 000739       | 49  | M      | 391                   | 35        | 39        | 67                         | 5                    |
| DF 000456       | 51  | M      | 114                   | 128       | 160       | 83                         | 5                    |
| DG 001250       | 47  | M      | 71                    | 49        | 53        | 105                        | 5                    |
| DH 001717       | 59  | M      | 106                   | 41        | 68        | 133                        | 5                    |
| DI 000921       | 50  | M      | 72                    | 91        | 112       | 81                         | 5                    |
| DJ 000126       | 46  | M      | 93                    | 136       | 107       | 89                         | 5                    |
| DJ 001652       | 42  | M      | 68                    | 58        | 62        | 88                         | 5                    |
| DB 001019       | 56  | F      | 225                   | 33        | 25        | 80                         | 5                    |
| DH 001870       | 64  | F      | 155                   | 28        | 43        | 94                         | 5                    |
| DD 001328       | 67  | M      | 140                   | 28        | 42        | 128                        | 6                    |
| DD 001630       | 57  | M      | 99                    | 34        | 39        | 75                         | 6                    |
| DF 000833       | 60  | M      | 98                    | 100       | 159       | 117                        | 6                    |
| DF 001246       | 46  | M      | 88                    | 71        | 51        | 150                        | 6                    |
| DI 000001       | 56  | M      | 93                    | 45        | 60        | 76                         | 6                    |
| DJ 001705       | 56  | M      | 106                   | 89        | 78        | 142                        | 6                    |
| DJ 002724       | 66  | M      | 167                   | 231       | 137       | 301                        | 6                    |
| DF 000839       | 50  | F      | 176                   | 244       | 291       | 127                        | 6                    |
| DI 000937       | 50  | F      | 83                    | 213       | 212       | 307                        | 6                    |
| DJ 000131       | 46  | F      | 95                    | 95        | 77        | 174                        | 6                    |

**Supp Table 2.** 87 proteins (shown with NCBI office symbol) previously detected by tandem mass spectrometry and tested by SRM with light peptides

|            |          |         |         |         |           |        |         |        |         |
|------------|----------|---------|---------|---------|-----------|--------|---------|--------|---------|
| A1BG**     | AGXT*    | AHSG**  | ALDOB   | ALT1#   | ALT2#     | AMBP** | ANG     | APCS** | APOA5   |
| APOC1      | APOC2**  | APOC4*  | APOF    | APOH**  | ASGR2     | ASL    | AST1**# | AST2#  | BHMT    |
| C8A        | C8B*     | C8G**   | C9**    | CES1*   | CFB**     | CFH**  | CFHR2** | CFHR4  | CHI3L1# |
| CP**       | CPB2**   | CPS1*   | DPYS    | F2**#   | F9**      | F10*   | F12**   | FAH**  | FBP1*   |
| FCN2       | FETUB**  | FGA*    | FGB*    | FGG*    | GC**      | GNMT   | GOLM1#  | GRN#   | HABP2** |
| HAMP       | HAO1     | HGD     | HGFAC** | HMGCS2* | HPD       | HPR*   | HPX     | HRG**  | HSPA9#  |
| IDH1       | IGFALS** | ITIH1** | ITIH2** | ITIH3** | ITIH4*    | LBP**  | LCAT**  | LPA**  | MASP2   |
| MAT1A*     | MBL2     | MDH     | MMP9#   | PEX1    | PGLYRP2** | PKLR*  | PROC**  | RBP4** | SAA4    |
| SERPINF2** | SPP2     | TAT     | TIMPI*  | TNC**#  | UPB1      | VTN**  |         |        |         |

\* endogenous peptide detected in pooled control plasma

\*\* endogenous peptide detected in control sera

# proteins used in clinic practice or previously reported as liver biomarker candidates

**Supplemental Table 3,** SRM monitoring conditions of 38 proteins that detectable in control sera.

Many proteins are represented by two or more peptides. **K:**  $^{13}\text{C}_6^{15}\text{N}_2$  isotopic-labeled lysine, **R:**  $^{13}\text{C}_6^{15}\text{N}_4$  isotopic-labeled arginine

| NCBI official Symbol | Description                         | Peptide Sequence | MH+ (mono) | Z (Q1) | Transitions |        |        |        |        |
|----------------------|-------------------------------------|------------------|------------|--------|-------------|--------|--------|--------|--------|
|                      |                                     |                  |            |        | Q1          | Q3     |        |        |        |
| A1BG                 | Alpha-1-B glycoprotein              | HQFLLTGDTQGR     | 1372.7     | 2      | 686.9       | 734.3  | 847.4  | 960.5  | 1107.6 |
|                      |                                     | HQFLLTGDTQGR     | 1382.7     |        | 691.9       | 744.3  | 857.4  | 970.5  | 1117.6 |
| A1BG                 | Alpha-1-B glycoprotein              | HQFLLTGDTQGR     | 1372.7     | 3      | 458.2       | 367.7  | 576.3  | 633.3  | 734.3  |
|                      |                                     | HQFLLTGDTQGR     | 1382.7     |        | 461.6       | 372.7  | 586.3  | 643.3  | 744.3  |
| A1BG                 | Alpha-1-B glycoprotein              | SGLSTGWTQLSK     | 1264.7     | 2      | 632.8       | 762.4  | 819.4  | 920.5  | 1007.5 |
|                      |                                     | SGLSTGWTQLSK     | 1272.7     |        | 636.8       | 770.4  | 827.4  | 928.5  | 1015.  |
| AHSG                 | Alpha-2-HS-glycoprotein             | EHAVEGDCDFLLK    | 1660.7     | 2      | 830.9       | 1095.5 | 1224.6 | 1323.6 | 1394.7 |
|                      |                                     | EHAVEGDCDFLLK    | 1668.7     |        | 834.9       | 1103.5 | 1232.6 | 1331.6 | 1402.7 |
| AHSG                 | Alpha-2-HS-glycoprotein             | HTLNQIDEVK       | 1196.6     | 2      | 598.8       | 731.4  | 845.4  | 958.5  | 1059.6 |
|                      |                                     | HTLNQIDEVK       | 1204.6     |        | 602.8       | 739.4  | 853.4  | 966.5  | 1067.6 |
| AMBP                 | Alpha-1-microglobulin/bikunin       | AFIQLWAFDAVK     | 1408.8     | 2      | 704.9       | 579.3  | 650.4  | 836.4  | 949.5  |
|                      |                                     | AFIQLWAFDAVK     | 1416.8     |        | 708.9       | 587.3  | 658.4  | 844.4  | 957.5  |
| AMBP                 | Alpha-1-microglobulin/bikunin       | GVCEETSGAYEK     | 1329.5     | 2      | 665.3       | 755.4  | 884.4  | 1013.4 | 1173.5 |
|                      |                                     | GVCEETSGAYEK     | 1337.5     |        | 669.3       | 763.4  | 892.4  | 1021.4 | 1181.5 |
| APCS                 | Amyloid P component, serum          | AYSLFSYNTQGR     | 1406.7     | 2      | 703.84      | 575.3  | 738.4  | 825.4  | 972.5  |
|                      |                                     | AYSLFSYNTQGR     | 1416.7     |        | 708.84      | 585.3  | 748.4  | 835.4  | 982.5  |
| APCS                 | Amyloid P component, serum          | VGEYSLYIGR       | 1156.6     | 2      | 578.8       | 508.3  | 621.4  | 708.4  | 871.5  |
|                      |                                     | VGEYSLYIGR       | 1166.6     |        | 583.8       | 518.3  | 631.4  | 718.4  | 881.5  |
| APOC2                | Apolipoprotein C-II                 | ESLSSYWESAK      | 1286.6     | 2      | 643.8       | 783.4  | 870.4  | 957.4  | 1070.5 |
|                      |                                     | ESLSSYWESAK      | 1294.6     |        | 647.8       | 791.4  | 878.4  | 965.4  | 1078.5 |
| APOC2                | Apolipoprotein C-II                 | TAAQNLYEK        | 1037.5     | 2      | 519.3       | 552.3  | 666.4  | 794.4  | 865.4  |
|                      |                                     | TAAQNLYEK        | 1045.5     |        | 523.3       | 560.3  | 674.4  | 802.4  | 873.4  |
| APOH                 | Apolipoprotein H                    | ATVVYQGER        | 1037.5     | 2      | 511.8       | 489.2  | 652.3  | 751.4  | 850.4  |
|                      |                                     | ATVVYQGER        | 1045.5     |        | 516.8       | 499.2  | 662.3  | 761.4  | 860.4  |
| APOH                 | Apolipoprotein H                    | EHSSLAFWK        | 1104.6     | 2      | 552.8       | 551.3  | 664.4  | 751.4  | 838.5  |
|                      |                                     | EHSSLAFWK        | 1112.6     |        | 556.8       | 559.3  | 672.4  | 759.4  | 846.5  |
| AST1                 | glutamic-oxaloacetic transaminase 1 | LALGDDSPALK      | 1099.6     | 2      | 550.3       | 745.4  | 802.4  | 915.5  | 986.5  |
|                      |                                     | LALGDDSPALK      | 1107.6     |        | 554.3       | 753.4  | 810.4  | 923.5  | 994.5  |
| AST1                 | glutamic-oxaloacetic transaminase 1 | TDDCHPWVLPVVK    | 1565.8     | 3      | 522.6       | 617.8  | 654.5  | 675.4  | 732.9  |
|                      |                                     | TDDCHPWVLPVVK    | 1573.8     |        | 525.3       | 621.8  | 662.5  | 679.4  | 736.9  |

|        |                                                                 |                                      |                    |   |                |                |                  |                  |                  |
|--------|-----------------------------------------------------------------|--------------------------------------|--------------------|---|----------------|----------------|------------------|------------------|------------------|
| C8G    | Complement component 8, gamma polypeptide                       | SLPVSDSVLSGFQQR<br>SLPVSDSVLSGFQQR   | 1620.8<br>1630.8   | 3 | 541.0<br>544.3 | 579.3<br>589.3 | 636.3<br>646.3   | 662.<br>667.3    | 710.9<br>715.9   |
| C9     | Complement component 9                                          | AIEDYINEFSVR<br>AIEDYINEFSVR         | 1455.7<br>1465.7   | 2 | 728.4<br>733.4 | 637.3<br>647.3 | 751.4<br>761.4   | 864.5<br>874.5   | 1271.6<br>1281.6 |
| CFB    | Complement factor B                                             | DFHINLFQVLPWLK<br>DFHINLFQVLPWLK     | 1770.0<br>1778.0   | 3 | 590.7<br>593.3 | 543.3<br>551.3 | 656.4<br>664.4   | 755.5<br>763.5   | 883.5<br>891.5   |
| CFB    | Complement factor B                                             | YGLVTYATYPK<br>YGLVTYATYPK           | 1275.7<br>1283.7   | 2 | 638.3<br>642.3 | 579.3<br>587.3 | 742.9<br>750.9   | 843.4<br>851.4   | 942.5<br>950.5   |
| CFH    | Complement factor H                                             | CTSTGWIPAPR<br>CTSTGWIPAPR           | 1245.6<br>1255.6   | 2 | 623.3<br>628.3 | 440.3<br>450.3 | 553.4<br>563.4   | 739.4<br>749.4   | 796.5<br>806.5   |
| CFHR2  | Complement factor H-related 2                                   | ITCAEEGWSPTPK<br>ITCAEEGWSPTPK       | 1475.7<br>1483.7   | 2 | 738.4<br>742.4 | 529.3<br>537.3 | 772.4<br>780.4   | 901.4<br>909.4   | 1030.5<br>1038.5 |
| CFHR2  | Complement factor H-related 2                                   | TGDIVEFVCK<br>TGDIVEFVCK             | 1167.6<br>1175.6   | 2 | 584.3<br>588.3 | 553.3<br>561.3 | 682.3<br>690.3   | 781.4<br>789.4   | 894.5<br>902.5   |
| CP     | Ceruloplasmin (ferroxidase)                                     | ALYLQYTDETFR<br>ALYLQYTDETFR         | 1519.7<br>1529.7   | 2 | 760.4<br>765.4 | 667.3<br>677.3 | 931.4<br>941.4   | 1059.5<br>1069.5 | 1172.6<br>1182.6 |
| CP     | Ceruloplasmin (ferroxidase)                                     | IYHSHIDAPK<br>IYHSHIDAPK             | 1180.6<br>1188.6   | 3 | 394.2<br>396.9 | 430.2<br>438.2 | 452.7<br>456.7   | 534.3<br>538.3   | 767.4<br>775.4   |
| CPB2   | Carboxypeptidase B2 (plasma)                                    | SFYANNHCIGTDLNR<br>SFYANNHCIGTDLNR   | 1781.8<br>1791.8   | 2 | 891.4<br>896.4 | 675.3<br>685.3 | 788.4<br>798.4   | 948.5<br>958.5   | 1085.5<br>1095.5 |
| CPB2   | Carboxypeptidase B2 (plasma)                                    | SFYANNHCIGTDLNR<br>SFYANNHCIGTDLNR   | 1781.8<br>1791.8   | 3 | 594.6<br>597.9 | 657.<br>662.3  | 692.8<br>697.8   | 774.4<br>779.4   | 948.5<br>958.5   |
| F12    | Coagulation factor XII                                          | CFEPQLLR<br>CFEPQLLR                 | 1062.5<br>1072.5   | 2 | 531.8<br>536.8 | 401.3<br>411.3 | 626.4<br>636.4   | 755.4<br>765.4   | 902.5<br>912.5   |
| F2     | Coagulation factor II (thrombin)                                | ELLESYIDGR<br>ELLESYIDGR             | 1194.6<br>1204.6   | 2 | 597.8<br>602.8 | 460.3<br>470.3 | 623.3<br>633.3   | 710.4<br>720.4   | 839.4<br>849.4   |
| F2     | Coagulation factor II (thrombin)                                | TATSEYQTFNPR<br>TATSEYQTFNPR         | 1561.7<br>1571.7   | 2 | 781.4<br>786.4 | 533.3<br>543.3 | 680.6<br>690.6   | 909.5<br>919.5   | 1072.5<br>1082.  |
| F9     | Coagulation factor IX                                           | WIVTAAHCVETGVK<br>WIVTAAHCVETGVK     | 1570.8<br>1578.8   | 3 | 524.3<br>526.9 | 536.3<br>540.3 | 586.8<br>590.8   | 636.3<br>640.3   | 692.9<br>696.9   |
| FAH    | Fumarylacetoacetate hydrolase                                   | VFLQNLLSVSQAR<br>VFLQNLLSVSQAR       | 1474.8<br>1484.8   | 2 | 737.9<br>742.9 | 560.3<br>570.3 | 647.4<br>657.4   | 760.4<br>770.4   | 987.6<br>997.6   |
| FETUB  | Fetuin B                                                        | IFFESVYGQCK<br>IFFESVYGQCK           | 1377.63<br>1385.63 | 2 | 689.3<br>693.3 | 492.2<br>500.2 | 655.3<br>663.3   | 841.4<br>849.4   | 1117.5<br>1125.5 |
| GC     | Group-specific component (vitamin D binding protein)            | HLSLLTTLNLR<br>HLSLLTTLNLR           | 1254.7<br>1264.7   | 3 | 418.9<br>422.3 | 376.2<br>386.2 | 489.3<br>499.3   | 590.3<br>600.3   | 691.4<br>701.4   |
| GC     | Group-specific component (vitamin D binding protein)            | VCSQYAAAYGEK<br>VCSQYAAAYGEK         | 1275.6<br>1283.6   | 2 | 638.3<br>642.3 | 496.2<br>504.2 | 567.3<br>575.3   | 801.4<br>809.4   | 1016.5<br>1024.5 |
| HABP2  | Hyaluronan binding protein 2                                    | DEIPHNDIALLK<br>DEIPHNDIALLK         | 1377.7<br>1385.7   | 3 | 459.9<br>462.6 | 444.3<br>452.3 | 462.3<br>466.3   | 510.8<br>514.8   | 567.3<br>571.3   |
| HABP2  | Hyaluronan binding protein 2                                    | GQCLITQSPYYR<br>GQCLITQSPYYR         | 1582.7<br>1592.7   | 2 | 791.9<br>796.9 | 695.4<br>705.4 | 782.4<br>792.4   | 910.4<br>920.4   | 1011.5<br>1021.5 |
| HGFAC  | HGF activator                                                   | TTDVTQTFGIEK<br>TTDVTQTFGIEK         | 1339.7<br>1347.7   | 2 | 670.3<br>674.3 | 694.4<br>702.4 | 822.4<br>830.4   | 923.5<br>931.5   | 1137.6<br>1145.6 |
| HGFAC  | HGF activator                                                   | VANYVDWINDR<br>VANYVDWINDR           | 1364.7<br>1374.7   | 2 | 682.8<br>687.8 | 703.4<br>713.4 | 818.4<br>828.4   | 917.5<br>927.5   | 1080.5<br>1090.5 |
| HP     | Haptoglobin                                                     | VGYSVSGWGR<br>VGYSVSGWGR             | 980.5<br>990.5     | 3 | 490.8<br>495.8 | 475.2<br>485.2 | 562.3<br>572.3   | 661.3<br>671.3   | 824.4<br>834.4   |
| HP     | Haptoglobin                                                     | VTSIQDWVQK<br>VTSIQDWVQK             | 1203.6<br>1211.6   | 2 | 602.3<br>606.3 | 560.3<br>568.3 | 675.4<br>683.4   | 803.4<br>811.4   | 1003.5<br>1011.5 |
| HRG    | Histidine-rich glycoprotein                                     | DSPVLIDFFEDTER<br>DSPVLIDFFEDTER     | 1682.8<br>1692.8   | 2 | 841.9<br>846.9 | 796.4<br>806.4 | 943.4<br>953.4   | 1058.4<br>1068.4 | 1171.5<br>1181.5 |
| HRG    | Histidine-rich glycoprotein                                     | GGEGTGYFVDFSVR<br>GGEGTGYFVDFSVR     | 1490.7<br>1500.7   | 2 | 745.9<br>750.9 | 869.6<br>879.6 | 1032.5<br>1042.5 | 1089.5<br>1099.5 | 1190.6<br>1200.6 |
| IGFALS | Insulin-like growth factor binding protein, acid labile subunit | LHSLHLEGSCLGR<br>LHSLHLEGSCLGR       | 1478.7<br>1488.7   | 3 | 493.6<br>496.9 | 514.8<br>519.8 | 614.8<br>619.8   | 649.3<br>659.3   | 778.4<br>788.4   |
| IGFALS | Insulin-like growth factor binding protein, acid labile subunit | VAGLLEDTFPGLLGLR<br>VAGLLEDTFPGLLGLR | 1671.0<br>1681.0   | 2 | 836.0<br>841.0 | 725.5<br>735.5 | 872.5<br>882.5   | 1088.6<br>1098.6 | 1217.7<br>1227.7 |

|          |                                               |                                        |                  |   |                |                |                  |                  |                  |
|----------|-----------------------------------------------|----------------------------------------|------------------|---|----------------|----------------|------------------|------------------|------------------|
| ITIH1    | Inter-alpha (globulin) inhibitor H1           | AAISGENAGLVR<br>AAISGENAGLVR           | 1157.6<br>1167.6 | 2 | 579.3<br>584.  | 629.4<br>639.4 | 758.4<br>768.4   | 815.4<br>825.4   | 902.5<br>912.5   |
| ITIH1    | Inter-alpha (globulin) inhibitor H1           | LDAQASFLPK<br>LDAQASFLPK               | 1089.6<br>1097.6 | 2 | 545.3<br>549.3 | 591.4<br>599.4 | 662.4<br>670.4   | 790.5<br>798.5   | 861.5<br>869.5   |
| ITIH2    | Inter-alpha (globulin) inhibitor H2           | TEVNVLPGAK<br>TEVNVLPGAK               | 1027.6<br>1035.6 | 2 | 514.3<br>518.3 | 372.2<br>380.2 | 485.3<br>493.3   | 698.4<br>706.4   | 797.5<br>805.5   |
| ITIH3    | Inter-alpha (globulin) inhibitor H3           | DYIFGNFYIER<br>DYIFGNFYIER             | 1289.6<br>1299.6 | 2 | 645.3<br>650.3 | 694.4<br>704.4 | 751.4<br>761.4   | 898.4<br>908.4   | 1011.5<br>1021.5 |
| LBP      | Lipopolysaccharide binding protein            | ITLPDFTGDLR<br>ITLPDFTGDLR             | 1247.7<br>1257.7 | 2 | 624.3<br>629.3 | 708.4<br>718.4 | 823.4<br>833.4   | 920.5<br>930.5   | 1033.5<br>1043.5 |
| LCAT     | Lecithin-cholesterol acyltransferase          | SSGLVSNAPGVQIR<br>SSGLVSNAPGVQIR       | 1384.8<br>1394.8 | 2 | 692.9<br>697.9 | 740.<br>750.45 | 854.5<br>864.5   | 941.5<br>951.5   | 1040.6<br>1050.6 |
| LCAT     | Lecithin-cholesterol acyltransferase          | TYSVEYLDSSK<br>TYSVEYLDSSK             | 1291.6<br>1299.6 | 2 | 646.3<br>650.3 | 712.4<br>720.4 | 841.39<br>849.41 | 940.5<br>948.5   | 1027.5<br>1035.5 |
| LPA      | Lipoprotein, Lp(a)                            | NPDAVAAPCYTR<br>NPDAVAAPCYTR           | 1497.7<br>1507.7 | 2 | 749.3<br>754.3 | 859.4<br>869.4 | 930.41<br>940.42 | 1001.5<br>1011.5 | 1100.5<br>1110.5 |
| PGLYRP2  | Peptidoglycan recognition protein 2           | PSLSHLLSQYYGAGVAR<br>PSLSHLLSQYYGAGVAR | 1819.0<br>1829.0 | 3 | 607.0<br>610.3 | 473.3<br>483.3 | 530.30<br>540.31 | 693.4<br>703.4   | 856.4<br>866.4   |
| PGLYRP2  | Peptidoglycan recognition protein 2           | TDCPGDALFDLLR<br>TDCPGDALFDLLR         | 1492.7<br>1502.7 | 2 | 746.9<br>751.  | 663.4<br>673.4 | 776.47<br>786.47 | 847.5<br>857.5   | 1116.6<br>1126.6 |
| PON1     | Paraoxonase 1                                 | EVQPVELPNCNLVK<br>EVQPVELPNCNLVK       | 1638.8<br>1646.8 | 2 | 819.9<br>823.9 | 844.4<br>852.4 | 957.5<br>965.5   | 1086.6<br>1094.6 | 1282.7<br>1290.7 |
| PON1     | Paraoxonase 1                                 | IFFYDSENPPASEVLR<br>IFFYDSENPPASEVLR   | 1883.9<br>1893.9 | 2 | 942.5<br>947.5 | 603.4<br>613.4 | 868.5<br>878.5   | 982.5<br>992.5   | 1198.6<br>1208.6 |
| PON1     | Paraoxonase 1                                 | IQNILTEEPK<br>IQNILTEEPK               | 1184.7<br>1192.7 | 2 | 592.8<br>596.8 | 603.3<br>611.3 | 716.4<br>724.4   | 829.5<br>837.5   | 943.5<br>951.5   |
| PROC     | Protein C                                     | EVFVHPNYSK<br>EVFVHPNYSK               | 1219.6<br>1227.6 | 2 | 610.3<br>614.3 | 608.3<br>616.3 | 745.4<br>753.4   | 844.4<br>852.4   | 991.5<br>999.5   |
| PROC     | Protein C                                     | TFVLNFIK<br>TFVLNFIK                   | 981.6<br>989.6   | 2 | 491.3<br>495.3 | 521.3<br>529.3 | 634.4<br>642.4   | 733.5<br>741.5   | 880.5<br>888.5   |
| RBP4     | Retinol binding protein 4, plasma             | YWGVASFLQK<br>YWGVASFLQK               | 1198.6<br>1206.6 | 2 | 599.8<br>603.8 | 535.3<br>543.3 | 622.4<br>630.4   | 693.4<br>701.4   | 849.5<br>857.5   |
| SERPINF2 | Serpin peptidase inhibitor, clade F, member 2 | LCQDLGPGAFR<br>LCQDLGPGAFR             | 1233.6<br>1243.6 | 2 | 617.3<br>622.3 | 547.3<br>557.3 | 604.3<br>614.3   | 717.4<br>727.4   | 960.5<br>970.5   |
| TNC      | Tenascin C (hexabrachion)                     | EEFWLGLDNLNK<br>EEFWLGLDNLNK           | 1477.7<br>1485.7 | 2 | 739.4<br>743.4 | 773.4<br>781.4 | 886.5<br>894.5   | 1072.6<br>1080.6 | 1219.7<br>1227.7 |
| TNC      | Tenascin C (hexabrachion)                     | ETFTTGLDAPR<br>ETFTTGLDAPR             | 1207.6<br>1217.6 | 2 | 604.3<br>609.3 | 628.3<br>638.3 | 729.4<br>739.4   | 830.4<br>840.4   | 977.5<br>987.5   |
| VTN      | Vitronectin                                   | DVWGIEGPIDAAFTR<br>DVWGIEGPIDAAFTR     | 1646.8<br>1656.8 | 2 | 823.9<br>828.9 | 890.5<br>900.5 | 947.5<br>957.5   | 1076.5<br>1086.5 | 1246.6<br>1256.6 |
| VTN      | Vitronectin                                   | GQYCYELDEK<br>GQYCYELDEK               | 1304.5<br>1312.5 | 2 | 652.8<br>656.8 | 504.3<br>512.3 | 633.3<br>641.3   | 796.4<br>804.4   | 956.4<br>964.4   |
